# Supplementary material for: Family Physicians’ Standpoint and Mental Health Assessment in the Light of COVID-19 Pandemic—A Nationwide Survey Study
Source: MDPI journal article supplement (doi:10.3390/ijerph18042093), 2021-02-21
Supplement: s1 [file s1]

## Supplementary material

**Table S1.** Correct answers on knowledge questionnaire questions in total study population.

| Knowledge question                                                                                                                                                                                     | Correct answer rate<br>(N=613) |
|--------------------------------------------------------------------------------------------------------------------------------------------------------------------------------------------------------|--------------------------------|
| <b>K1.</b> The main clinical symptoms of COVID-19 are fever, fatigue and cough.                                                                                                                        | 602 (98.2)                     |
| <b>K2.</b> Complications of COVID-19 include increased formation of blood clots and acute kidney injury.                                                                                               | 544 (88.7)                     |
| <b>K3.</b> Unlike common cold, stuffy nose, runny nose, and sneezing are less common in COVID-19 patients.                                                                                             | 419 (68.4)                     |
| <b>K4.</b> There is currently no effective cure for COVID-19, but early symptomatic treatment can help most patients recover from the infection.                                                       | 552 (90.0)                     |
| <b>K5.</b> COVID-19 mainly spreads via respiratory droplets of infected individuals through coughing and sneezing.                                                                                     | 606 (98.9)                     |
| <b>K6.</b> The virus can be transmitted with fecal-oral pathway.                                                                                                                                       | 212 (34.6)                     |
| <b>K7.</b> Patients with COVID-19 cannot transmit the virus to others if the fever is not present.                                                                                                     | 577 (94.1)                     |
| <b>K8.</b> COVID-19 is transmitted indirectly by touching surfaces and devices contaminated with the secretions of the patient and then by touching the mouth, nose, or eye.                           | 591 (96.4)                     |
| <b>K9.</b> Basic Reproductive Rate (R0) for COVID-19 is estimated to be between 2 and 4.                                                                                                               | 296 (48.3)                     |
| <b>K10.</b> Patients may still be infectious after they improve clinically.                                                                                                                            | 544 (88.7)                     |
| <b>K11.</b> Vomiting and diarrhea are possible, but not common symptoms of COVID-19.                                                                                                                   | 588 (95.9)                     |
| <b>K12.</b> There is moderate risk in transmitting COVID-19 in dealing with domestic animals.                                                                                                          | 244 (39.8)                     |
| <b>K13.</b> The incubation period of the disease is from 1 to 14 days.                                                                                                                                 | 579 (94.5)                     |
| <b>K14.</b> Antibiotics and usual antiviral drugs are first treatment of choice for COVID-19.                                                                                                          | 385 (62.8)                     |
| <b>K15.</b> For COVID-19, around 10-15% cases progress to severe disease that requires oxygen treatment, while around 5% become critically ill, requiring ventilation.                                 | 547 (89.2)                     |
| <b>K16.</b> In close contacts of a confirmed COVID-19 patient who has no signs of disease, testing for the new coronavirus is not routinely performed either at the beginning or during the isolation. | 592 (96.6)                     |
| <b>K17.</b> Mortality from COVID-19 appears to be lower than from seasonal influenza.                                                                                                                  | 362 (59.1)                     |
| <b>K18.</b> As it proposes low risk for severe disease, it is not necessary for children and young adults to take measures in preventing COVID-19 infection.                                           | 574 (93.6)                     |
| <b>K19.</b> Pregnancy facilitates the severity of COVID-19 and pregnant women are more likely to need intensive care if severely ill.                                                                  | 97 (15.8)                      |
| <b>K20.</b> Fatigue, cough and loss of taste and/or smell are some of the symptoms that can persist even after the acute phase of the disease.                                                         | 608 (99.2)                     |

COVID-19- coronavirus disease 2019.

Data are presented as N (%).

**Table S2.** Attitudes regarding COVID-19 of the total study population (N=613).

| Attitudes                                                                                                                           | Fully disagree | Disagree      | Neither agree nor disagree | Agree         | Fully agree   |
|-------------------------------------------------------------------------------------------------------------------------------------|----------------|---------------|----------------------------|---------------|---------------|
| A1. Face mask can prevent viral transmission.                                                                                       | 7<br>(1.1)     | 21<br>(3.4)   | 41<br>(6.7)                | 296<br>(48.3) | 248<br>(40.5) |
| A2. PPE is not enough to protect us from infection.                                                                                 | 62<br>(10.1)   | 293<br>(47.8) | 76<br>(12.4)               | 157<br>(25.6) | 25<br>(4.1)   |
| A3. I am afraid of getting the disease during work.                                                                                 | 42<br>(6.9)    | 82<br>(13.4)  | 118<br>(19.2)              | 282<br>(46.0) | 89<br>(14.5)  |
| A4. I am concerned about the social isolation present during the COVID-19 pandemic.                                                 | 24<br>(3.9)    | 53<br>(8.6)   | 67<br>(10.9)               | 330<br>(53.8) | 139<br>(22.7) |
| A5. I am concerned about the risk that COVID-19 poses to my family and friends.                                                     | 17<br>(2.8)    | 33<br>(5.4)   | 56<br>(9.1)                | 337<br>(55.0) | 170<br>(27.7) |
| A6. When a vaccine for the COVID-19 is developed, the spread of the epidemic can be significantly reduced.                          | 20<br>(3.3)    | 43<br>(7.0)   | 75<br>(12.2)               | 305<br>(49.8) | 170<br>(27.7) |
| A7. If the COVID-19 vaccine becomes available in the next 6 months, I would vaccinate myself.                                       | 54<br>(8.8)    | 72<br>(11.7)  | 172<br>(28.1)              | 189<br>(30.8) | 126<br>(20.6) |
| A8. PPE is not available in sufficient amount for the family physicians.                                                            | 29<br>(4.7)    | 92<br>(15.0)  | 60<br>(9.8)                | 264<br>(43.1) | 168<br>(27.4) |
| A9. Family physicians are well trained and educated regarding usage of PPE.                                                         | 46<br>(7.5)    | 159<br>(26.0) | 113<br>(18.4)              | 211<br>(34.4) | 84<br>(13.7)  |
| A10. Hydroxychloroquine treatment is an excellent measure for COVID-19 prevention.                                                  | 252<br>(41.1)  | 185<br>(30.2) | 146<br>(23.8)              | 24<br>(3.9)   | 6<br>(1.0)    |
| A11. Family physicians are prescribing more antibiotics in comparison with the time before pandemic.                                | 112<br>(18.3)  | 145<br>(23.6) | 88<br>(14.4)               | 179<br>(29.2) | 89<br>(14.5)  |
| A12. This year, I am planning to get a seasonal influenza vaccination.                                                              | 68<br>(11.1)   | 66<br>(10.8)  | 49<br>(8.0)                | 199<br>(32.4) | 231<br>(37.7) |
| A13. I regularly follow updates with newest information on COVID-19.                                                                | 16<br>(2.6)    | 28<br>(4.6)   | 58<br>(9.5)                | 350<br>(57.1) | 161<br>(26.3) |
| A14. I have read articles published in scientific journals related to COVID-19.                                                     | 27<br>(4.4)    | 104<br>(17.0) | 76<br>(12.4)               | 276<br>(45.0) | 130<br>(21.2) |
| A15. I would like to attend more educational seminars on COVID-19 if they were organized in my area or through online applications. | 28<br>(4.6)    | 32<br>(5.2)   | 95<br>(15.5)               | 322<br>(52.5) | 136<br>(22.2) |

COVID-19- coronavirus disease 2019; PPE- personal protective equipment

Data are presented as N (%)

**Table S3.** Practices regarding COVID-19 of the total study population (N=613).

| Practices                                                                                | Never         | Sometimes     | Often         | Always        |
|------------------------------------------------------------------------------------------|---------------|---------------|---------------|---------------|
| P1. I clean my hands with soap and water for at least 30 s regularly and thoroughly.     | 4<br>(0.7)    | 25<br>(4.1)   | 254<br>(41.4) | 330<br>(53.8) |
| P2. I cover my mouth and nose with a tissue and/or bend my elbow when I cough or sneeze. | 4<br>(0.7)    | 17<br>(2.8)   | 174<br>(28.3) | 418<br>(68.2) |
| P3. I wash my nose with a saline solution.                                               | 223<br>(36.4) | 194<br>(31.6) | 147<br>(24.0) | 49<br>(8.0)   |

|                                                                                                                            |               |               |               |               |
|----------------------------------------------------------------------------------------------------------------------------|---------------|---------------|---------------|---------------|
| <b>P4.</b> I wash my hands before wearing and after removing the mask.                                                     | 20<br>(3.3)   | 161<br>(26.3) | 232<br>(37.8) | 200<br>(32.6) |
| <b>P5.</b> When I am leaving home, I wear a mask and change it regularly.                                                  | 12<br>(2.0)   | 59<br>(9.6)   | 233<br>(38.0) | 309<br>(50.4) |
| <b>P6.</b> When I am leaving home, I wear protective gloves and change them regularly.                                     | 249<br>(40.6) | 216<br>(35.2) | 104<br>(17.0) | 44<br>(7.2)   |
| <b>P7.</b> I am avoiding social gatherings.                                                                                | 8<br>(1.3)    | 67<br>(10.9)  | 231<br>(37.7) | 307<br>(50.1) |
| <b>P8.</b> I canceled or postponed meetings with friends, and going to social and sporting events.                         | 7<br>(1.1)    | 91<br>(14.9)  | 244<br>(39.8) | 271<br>(44.2) |
| <b>P9.</b> I educated my family and friends about COVID-19 prevention measures.                                            | 3<br>(0.5)    | 26<br>(4.2)   | 271<br>(44.2) | 313<br>(51.1) |
| <b>P10.</b> I regularly clean and disinfect surfaces at my workplace.                                                      | 7<br>(1.1)    | 34<br>(5.5)   | 259<br>(42.3) | 313<br>(51.1) |
| <b>P11.</b> I wear a mask while interacting with patients.                                                                 | 0<br>(0.0)    | 4<br>(0.7)    | 99<br>(16.2)  | 510<br>(83.2) |
| <b>P12.</b> I wear protective gloves when interacting with patients.                                                       | 30<br>(4.9)   | 127<br>(20.7) | 242<br>(39.5) | 214<br>(34.9) |
| <b>P13.</b> I perform hand hygiene before and after touching the patients for examination.                                 | 1<br>(0.2)    | 10<br>(1.6)   | 128<br>(20.9) | 474<br>(77.3) |
| <b>P14.</b> I practice social distancing, and keeping at least 1 m away from patients and other health care professionals. | 2<br>(0.3)    | 27<br>(4.4)   | 188<br>(30.7) | 396<br>(64.6) |
| <b>P15.</b> I educate my patients about preventative measures for COVID-19.                                                | 2<br>(0.3)    | 19<br>(3.1)   | 198<br>(32.3) | 394<br>(64.3) |

**COVID-19-** coronavirus disease 2019

Data are presented as N (%)

**Table S4.** Attitudes regarding impact of the pandemic on patients that require chronic care due to noncommunicable diseases (N=613).

| Attitudes                                                                                                             | Fully disagree | Disagree      | Neither agree nor disagree | Agree         | Fully agree   |
|-----------------------------------------------------------------------------------------------------------------------|----------------|---------------|----------------------------|---------------|---------------|
| <b>A_NCD1.</b> During the COVID-19 pandemic, NCD patients had limited accessibility to family physicians.             | 122<br>(19.9)  | 130<br>(21.2) | 54<br>(8.8)                | 247<br>(40.3) | 60<br>(9.8)   |
| <b>A_NCD2.</b> During the average day, family physician service is provided to lesser number of NCD patients.         | 195<br>(31.8)  | 229<br>(37.4) | 39<br>(6.4)                | 103<br>(16.8) | 47<br>(7.6)   |
| <b>A_NCD3.</b> I have more time to devote to the NCD patient.                                                         | 257<br>(41.9)  | 200<br>(32.6) | 90<br>(14.7)               | 47<br>(7.7)   | 19<br>(3.1)   |
| <b>A_NCD4.</b> There is decreased number of newly diagnosed NCD patients in comparison with time before the pandemic. | 30<br>(4.9)    | 61<br>(10.0)  | 81<br>(13.2)               | 297<br>(48.5) | 144<br>(23.5) |
| <b>A_NCD5.</b> COVID-19 pandemic aggravates the availability of necessary specialist conciliatory examinations.       | 15<br>(2.4)    | 44<br>(7.2)   | 59<br>(9.6)                | 295<br>(48.1) | 200<br>(32.6) |
| <b>A_NCD6.</b> COVID-19 pandemic aggravates the availability of necessary diagnostic procedures.                      | 11<br>(1.8)    | 52<br>(8.5)   | 56<br>(9.1)                | 292<br>(47.6) | 202<br>(33.0) |

|                                                                                                                                                    |               |               |               |               |               |
|----------------------------------------------------------------------------------------------------------------------------------------------------|---------------|---------------|---------------|---------------|---------------|
| <b>A_NCD7.</b> COVID-19 pandemic aggravates the availability of chronic therapy.                                                                   | 217<br>(35.4) | 285<br>(46.5) | 51<br>(8.3)   | 31<br>(5.1)   | 29<br>(4.7)   |
| <b>A_NCD8.</b> During the COVID-19 pandemic, NCD patients experienced illness exacerbation.                                                        | 62<br>(10.1)  | 162<br>(26.4) | 230<br>(37.5) | 117<br>(19.1) | 42<br>(6.9)   |
| <b>A_NCD9.</b> NCD patients died in larger numbers from their illnesses in comparison with time before the pandemic.                               | 74<br>(12.1)  | 141<br>(23.0) | 253<br>(41.3) | 105<br>(17.1) | 40<br>(6.5)   |
| <b>A_NCD10.</b> NCD patients take their therapy less regularly and properly.                                                                       | 123<br>(20.0) | 180<br>(29.4) | 115<br>(18.8) | 150<br>(24.5) | 45<br>(7.3)   |
| <b>A_NCD11.</b> NCD patients are in fear of COVID-19 infection.                                                                                    | 7<br>(1.1)    | 11<br>(1.8)   | 43<br>(7.0)   | 328<br>(53.5) | 224<br>(36.5) |
| <b>A_NCD12.</b> During the pandemic, harmful, unhealthy habits of NCD patients, such as substance addiction and unhealthy eating habits, worsened. | 19<br>(3.1)   | 62<br>(10.1)  | 190<br>(31.0) | 273<br>(44.5) | 69<br>(11.3)  |
| <b>A_NCD13.</b> NCD patients adhere properly to preventive epidemiological measures.                                                               | 27<br>(4.4)   | 183<br>(29.8) | 214<br>(34.9) | 168<br>(27.4) | 21<br>(3.4)   |
| <b>A_NCD14.</b> Due to the COVID-19 pandemic, NCD patients will have to spend more money on their disease.                                         | 48<br>(7.8)   | 126<br>(20.6) | 182<br>(29.7) | 206<br>(33.6) | 51<br>(8.3)   |
| <b>A_NCD15.</b> NCD patients will suffer from a lack of physical activity, caused by limited opportunities during pandemic.                        | 19<br>(3.1)   | 60<br>(9.8)   | 171<br>(27.9) | 232<br>(37.8) | 131<br>(21.4) |

**NCD- noncommunicable disease; COVID-19- coronavirus disease 2019**

Data are presented as N (%)
